# Supplementary material
Source: PubMed Central journal article supplement (PMC5102139)
Supplement: EBM662361_Supplementary_Tables.pdf [file EBM662361_Supplementary_Tables.pdf]

**Table S1. Relationship between GO biological processes and cerebral ischemia supported by previous literature between BA, JA and UA-RM<sup>E</sup>s.**

| <b>Groups</b>    | <b>GO biological processes</b>                                                                 | <b>References</b>   | <b>Whether related to CI</b> |
|------------------|------------------------------------------------------------------------------------------------|---------------------|------------------------------|
| <b>BA and UA</b> | <b>Regulation of binding</b>                                                                   | <b>1,2</b>          | <b>Yes</b>                   |
| <b>JA and UA</b> | <b>Secretion by cell</b>                                                                       | <b>3</b>            | <b>Yes</b>                   |
| <b>BA</b>        | <b>Negative regulation of ubiquitin-protein ligase activity involved in mitotic cell cycle</b> | <b>4,5</b>          | <b>Yes</b>                   |
|                  | <b>Regulation of JAK-STAT cascade</b>                                                          | <b>6</b>            | <b>Yes</b>                   |
|                  | <b>Positive regulation of protein transport</b>                                                | <b>7</b>            | <b>Yes</b>                   |
|                  | <b>Translational elongation</b>                                                                | <b>8</b>            | <b>Yes</b>                   |
|                  | <b>Skeletal myofibril assembly</b>                                                             | <b>9</b>            | <b>Yes</b>                   |
|                  | <b>Signal transduction</b>                                                                     | <b>10</b>           | <b>Yes</b>                   |
|                  | <b>Generation of precursor metabolites and energy</b>                                          | <b>11</b>           | <b>Yes</b>                   |
|                  | <b>Oxaloacetate metabolic process</b>                                                          | <b>12</b>           | <b>Yes</b>                   |
| <b>JA</b>        | <b>Branched chain family amino acid catabolic process</b>                                      | <b>13</b>           | <b>Yes</b>                   |
|                  | <b>Negative regulation of DNA replication</b>                                                  | <b>14</b>           | <b>Yes</b>                   |
|                  | <b>Nuclear export</b>                                                                          | <b>15</b>           | <b>Yes</b>                   |
|                  | <b>Establishment of protein localization</b>                                                   | <b>16</b>           | <b>Yes</b>                   |
|                  | <b>Sister chromatid cohesion</b>                                                               | <b>not reported</b> | <b>\</b>                     |
|                  | <b>Cellular homeostasis</b>                                                                    | <b>17</b>           | <b>Yes</b>                   |
| <b>UA</b>        | <b>Peroxisome membrane biogenesis</b>                                                          | <b>not reported</b> | <b>\</b>                     |
|                  | <b>Purine base metabolic process</b>                                                           | <b>18</b>           | <b>Yes</b>                   |

**Note:** CI = cerebral ischemia; RM<sup>E</sup>s = emerged responsive modules

#### **References**

1. Camós S, Gubern C, Sobrado M, Rodríguez R, Romera VG, Moro MÁ, et al. Oct-2 transcription factor binding activity and expression up-regulation in rat cerebral ischaemia is associated with a diminution of neuronal damage in vitro. *Neuromolecular Med.* 2014;16(2):332-49.
2. Samraj AK, Müller AH, Grell AS, Edvinsson L. Role of unphosphorylated transcription factor STAT3 in late cerebral ischemia after subarachnoid hemorrhage. *J Cereb Blood Flow Metab.* 2014;34:759-63.
3. Li ST, Pan J, Hua XM, Liu H, Shen S, Liu JF, et al. Endothelial nitric oxide synthase protects neurons against ischemic injury through regulation of brain-derived neurotrophic factor expression. *CNS Neurosci Ther.* 2014;20:154-64.
4. Qiu J, Zhang C, Lv Y, Zhang Y, Zhu C, Wang X, et al. Cdh1 inhibits reactive astrocyte proliferation after oxygen-glucose deprivation and reperfusion. *Neurochem Int.* 2013;63:87-92.

5. Zhang Y, Yao W, Qiu J, Qian W, Zhu C, Zhang C. The involvement of down-regulation of Cdh1-APC in hippocampal neuronal apoptosis after global cerebral ischemia in rat. *Neurosci Lett*. 2011;505:71-5.
6. Justicia C, Gabriel C, Planas AM. Activation of the JAK/STAT pathway following transient focal cerebral ischemia: signaling through Jak1 and Stat3 in astrocytes. *Glia*. 2000;30:253-70.
7. Yatomi Y, Tanaka R, Shimura H, Miyamoto N, Yamashiro K, Takanashi M, et al. Chronic brain ischemia induces the expression of glial glutamate transporter EAAT2 in subcortical white matter. *Neuroscience*. 2013;244:113-21.
8. Alirezaei M, Marin P, Nairn AC, Glowinski J, Prémont J. Inhibition of protein synthesis in cortical neurons during exposure to hydrogen peroxide. *J Neurochem*. 2001;76:1080-8.
9. Lutz GJ, Lieber RL. Skeletal muscle myosin II structure and function. *Exerc Sport Sci Rev*. 1999;27:63-77.
10. Kilic U, Yilmaz B, Reiter RJ, Yüksel A, Kilic E. Effects of memantine and melatonin on signal transduction pathways vascular leakage and brain injury after focal cerebral ischemia in mice. *Neuroscience*. 2013;237:268-76.
11. Abramov AY, Scorziello A, Duchen MR. Three distinct mechanisms generate oxygen free radicals in neurons and contribute to cell death during anoxia and reoxygenation. *J Neurosci*. 2007;27:1129-38.
12. Marosi M, Fuzik J, Nagy D, Rákos G, Kis Z, Vécsei L, et al. Oxaloacetate restores the long-term potentiation impaired in rat hippocampus CA1 region by 2-vessel occlusion. *Eur J Pharmacol*. 2009;604:51-7.
13. Kimberly WT, Wang Y, Pham L, Furie KL, Gerszten RE. Metabolite profiling identifies a branched chain amino acid signature in acute cardioembolic stroke. *Stroke*. 2013;44:1389-95.
14. Kuan CY, Schloemer AJ, Lu A, Burns KA, Weng WL, Williams MT, et al. Hypoxia-ischemia induces DNA synthesis without cell proliferation in dying neurons in adult rodent brain. *J Neurosci*. 2004;24:10763-72.
15. Zhu J, Shen W, Gao L, Gu H, Shen S, Wang Y, et al. PI3K/Akt-independent negative regulation of JNK signaling by MKP-7 after cerebral ischemia in rat hippocampus. *BMC Neurosci*. 2013;14:1.
16. Plate KH, Beck H, Danner S, Allegrini PR, Wiessner C. Cell type specific upregulation of vascular endothelial growth factor in an MCA-occlusion model of cerebral infarct. *J Neuropathol Exp Neurol*. 1999;58:654-66.
17. Godínez-Rubí M, Rojas-Mayorquín AE, Ortuño-Sahagún D. Nitric oxide donors as neuroprotective agents after an ischemic stroke-related inflammatory reaction. *Oxid Med Cell Longev*. 2013;2013:297357.
18. Yang M, Wang S, Hao F, Li Y, Tang H, Shi X. NMR analysis of the rat neurochemical changes induced by middle cerebral artery occlusion. *Talanta*. 2012 J;88:136-44.

**Table S2. Relationship between GO biological processes and cerebral ischemia supported by previous literature between BA, JA and UA-RM<sup>D</sup>s.**

| <b>Groups</b>       | <b>GO biological processes</b>                                         | <b>References</b>   | <b>Whether related to CI</b> |
|---------------------|------------------------------------------------------------------------|---------------------|------------------------------|
| <b>BA,JA and UA</b> | <b>mRNA polyadenylation</b>                                            | <b>1</b>            | <b>Yes</b>                   |
| <b>BA,JA and UA</b> | <b>Lipoate metabolic process</b>                                       | <b>2,3</b>          | <b>Yes</b>                   |
| <b>BA and JA</b>    | <b>Regulation of cellular protein metabolic process</b>                | <b>4</b>            | <b>Yes</b>                   |
|                     | <b>Methylation</b>                                                     | <b>5</b>            | <b>Yes</b>                   |
|                     | <b>Regulation of kinase activity</b>                                   | <b>6</b>            | <b>Yes</b>                   |
| <b>JA and UA</b>    | <b>Regulation of transcription elongation, DNA-dependent</b>           | <b>7</b>            | <b>No</b>                    |
|                     | <b>Misfolded or incompletely synthesized protein catabolic process</b> | <b>8</b>            | <b>Yes</b>                   |
|                     | <b>Negative regulation of phosphorylation</b>                          | <b>9</b>            | <b>Yes</b>                   |
|                     | <b>Positive regulation of cellular component organization</b>          | <b>not reported</b> | <b>\</b>                     |
| <b>BA and UA</b>    | <b>Protein ADP-ribosylation</b>                                        | <b>10</b>           | <b>Yes</b>                   |
|                     | <b>Complement activation, classical pathway</b>                        | <b>11</b>           | <b>Yes</b>                   |
|                     | <b>Sensory perception of pain</b>                                      | <b>12</b>           | <b>Yes</b>                   |
|                     | <b>Regulation of gene expression</b>                                   | <b>13</b>           | <b>Yes</b>                   |
| <b>BA</b>           | <b>Golgi transport vesicle coating</b>                                 | <b>not reported</b> | <b>\</b>                     |
|                     | <b>Maintenance of protein location in cell</b>                         | <b>not reported</b> | <b>\</b>                     |
| <b>JA</b>           | <b>RNA stabilization</b>                                               | <b>14</b>           | <b>Yes</b>                   |
|                     | <b>Regulation of cellular biosynthetic process</b>                     | <b>15</b>           | <b>Yes</b>                   |
| <b>UA</b>           | <b>Negative regulation of transport</b>                                | <b>16</b>           | <b>Yes</b>                   |
|                     | <b>Tricarboxylic acid cycle</b>                                        | <b>17</b>           | <b>Yes</b>                   |

**Note:** CI = cerebral ischemia; RM<sup>D</sup>s = disappeared responsive modules.

#### **References**

1. Alsbo CW, Wrang ML, Nielsen M, Diemer NH. Ischemic tolerance affects the adenylation state of GluR2 mRNA. *Neuroreport*. 2000;11:3279-82.
2. Packer L, Tritschler HJ, Wessel K. Neuroprotection by the metabolic antioxidant alpha-lipoic acid. *Free Radic Biol Med*. 1997;22:359-78.
3. Connell BJ, Saleh M, Khan BV, Saleh TM. Lipoic acid protects against reperfusion injury in the early stages of cerebral ischemia. *Brain Res*. 2011;1375:128-36.
4. Shen B, Zhou S, He Y, Zhao H, Mei M, Wu X. Revealing the underlying mechanism of ischemia reperfusion injury using bioinformatics approach. *Kidney Blood Press Res*. 2013;38:99-108.

5. Endres M, Meisel A, Biniszkiwicz D, Namura S, Prass K, Ruscher K, et al. DNA methyltransferase contributes to delayed ischemic brain injury. *J Neurosci*. 2000;20:3175-81.
6. Braunton JL, Wong V, Wang W, Salter MW, Roder J, Liu M, et al. Reduction of tyrosine kinase activity and protein tyrosine dephosphorylation by anoxic stimulation in vitro. *Neuroscience*. 1998;82:161-70.
7. Kulish D, Struhl K. TFIIIS enhances transcriptional elongation through an artificial arrest site in vivo. *Mol Cell Biol*. 2001;21:4162-8.
8. Liu Y, Lü L, Hettinger CL, Dong G, Zhang D, Rezvani K, et al. Ubiquilin-1 protects cells from oxidative stress and ischemic stroke caused tissue injury in mice. *J Neurosci*. 2014;34:2813-21
9. Zeng L, Tan J, Lu W, Hu Z. Blockade of Ser16-Hsp20 phosphorylation attenuates neuroprotection dependent upon Bcl-2 and Bax. *Curr Neurovasc Res*. 2013;10:208-15.
10. Banasik M, Stedeford T, Strosznajder RP. Natural inhibitors of poly(ADP-ribose) polymerase-1. *Mol Neurobiol*. 2012;46:55-63.
11. Cowell RM, Plane JM, Silverstein FS. Complement activation contributes to hypoxic-ischemic brain injury in neonatal rats. *J Neurosci*. 2003;23:9459-68.
12. Leng TD, Xiong ZG. The pharmacology and therapeutic potential of small molecule inhibitors of acid-sensing ion channels in stroke intervention. *Acta Pharmacol Sin*. 2013;34:33-8.
13. Wu P, Zuo X, Ji A. Stroke-induced microRNAs: The potential therapeutic role for stroke. *Exp Ther Med*. 2012;3:571-576.
14. Li W, Cheng X, Chen HS, He ZY. Apobec-1 increases cyclooxygenase-2 and aggravates injury in oxygen-deprived neurogenic cells and middle cerebral artery occlusion rats. *Neurochem Res*. 2013;38:1434-45.
15. Lambertsen KL, Meldgaard M, Ladeby R, Finsen B. A quantitative study of microglial-macrophage synthesis of tumor necrosis factor during acute and late focal cerebral ischemia in mice. *J Cereb Blood Flow Metab*. 2005;25:119-35.
16. Yang ZB, Zhang Z, Li TB, Lou Z, Li SY, Yang H, et al. Up-regulation of brain-enriched miR-107 promotes excitatory neurotoxicity through down-regulation of glutamate transporter-1 expression following ischaemic stroke. *Clin Sci (Lond)*. 2014;127:679-89.
17. Yang M, Wang S, Hao F, Li Y, Tang H, Shi X. NMR analysis of the rat neurochemical changes induced by middle cerebral artery occlusion. *Talanta*. 2012;88:136-44.

**Table S3. Relationship between GO biological processes and cerebral ischemia supported by previous literature of BJ and JU-RM<sup>E</sup>s.**

| <b>Groups</b> | <b>GO biological processes</b>                                                | <b>References</b>   | <b>Whether related to CI</b> |
|---------------|-------------------------------------------------------------------------------|---------------------|------------------------------|
| <b>BJ</b>     | <b>Regulation of macromolecule metabolic process</b>                          | <b>not reported</b> | <b>\</b>                     |
|               | <b>Ribosome biogenesis</b>                                                    | <b>not reported</b> | <b>\</b>                     |
|               | <b>Induction of apoptosis</b>                                                 | <b>1,2</b>          | <b>Yes</b>                   |
|               | <b>Transcription from RNA polymerase II promoter</b>                          | <b>not reported</b> | <b>\</b>                     |
|               | <b>Cell cycle process</b>                                                     | <b>3</b>            | <b>Yes</b>                   |
|               | <b>Regulation of establishment of protein localization in plasma membrane</b> | <b>not reported</b> | <b>\</b>                     |
|               | <b>Localization</b>                                                           | <b>4,5</b>          | <b>Yes</b>                   |
| <b>JU</b>     | <b>Positive regulation of nitrogen compound metabolic process</b>             | <b>not reported</b> | <b>\</b>                     |
|               | <b>MyD88-dependent toll-like receptor signaling pathway</b>                   | <b>6,7</b>          | <b>Yes</b>                   |

**Note:** CI = cerebral ischemia; RM<sup>E</sup>s = emerged responsive modules.

#### **References**

1. Chopp M, Li Y, Jiang N. Increase in apoptosis and concomitant reduction of ischemic lesion volume and evidence for synaptogenesis after transient focal cerebral ischemia in rat treated with staurosporine. *Brain Res.* 1999;828:197-201.
2. Vexler ZS, Roberts TP, Bollen AW, Derugin N, Arief AI. Transient cerebral ischemia. Association of apoptosis induction with hypoperfusion. *J Clin Invest.* 1997;99:1453-9.
3. Wen Y, Yang S, Liu R, Simpkins JW. Cell-cycle regulators are involved in transient cerebral ischemia induced neuronal apoptosis in female rats. *FEBS Lett.* 2005;579:4591-9. erfusion induced neuronal damage.
4. Ullrich N, Strecker JK, Minnerup J, Schilling M. The temporo-spatial localization of polymorphonuclear cells related to the neurovascular unit after transient focal cerebral ischemia. *Brain Res.* 2014;1586:184-92.
5. Han D, Scott EL, Dong Y, Raz L, Wang R, Zhang Q. Attenuation of mitochondrial and nuclear p38 $\alpha$  signaling: a novel mechanism of estrogen neuroprotection in cerebral ischemia. *Mol Cell Endocrinol.* 2015;400:21-31.
6. Downes CE, Wong CH, Henley KJ, Guio-Aguilar PL, Zhang M, Ates R, et al. MyD88 is a critical regulator of hematopoietic cell-mediated neuroprotection seen after stroke. *PLoS One.* 2013;8:e57948.
7. Gao Y, Fang X, Tong Y, Liu Y, Zhang B. TLR4-mediated MyD88-dependent signaling pathway is activated by cerebral ischemia-reperfusion in cortex in mice. *Biomed Pharmacother.* 2009;63:442-50.

**Table S4. Relationship between GO biological processes and cerebral ischemia supported by previous literature of BJ and JU-RM<sup>D</sup>s.**

| <b>Groups</b> | <b>GO biological processes</b>                     | <b>References</b>   | <b>Whether related to CI</b> |
|---------------|----------------------------------------------------|---------------------|------------------------------|
| <b>BJ</b>     | <b>Regulation of cellular biosynthetic process</b> | <b>not reported</b> | <b>\</b>                     |
|               | <b>Vesicle docking involved in exocytosis</b>      | <b>not reported</b> | <b>\</b>                     |
|               | <b>Chordate embryonic development</b>              | <b>not reported</b> | <b>\</b>                     |
|               | <b>Nucleotide-excision repair</b>                  | <b>1,2</b>          | <b>Yes</b>                   |
|               | <b>2-deoxyribonucleotide metabolic process</b>     | <b>not reported</b> | <b>\</b>                     |
|               | <b>Catabolic process</b>                           | <b>3</b>            | <b>Yes</b>                   |
| <b>JU</b>     | <b>Epithelial structure maintenance</b>            | <b>not reported</b> | <b>\</b>                     |
|               | <b>Nucleotide-excision repair</b>                  | <b>1,2</b>          | <b>Yes</b>                   |
|               | <b>Golgi transport vesicle coating</b>             | <b>not reported</b> | <b>\</b>                     |
|               | <b>Epithelial structure maintenance</b>            | <b>not reported</b> | <b>\</b>                     |

**Note:** CI = cerebral ischemia; RM<sup>D</sup>s = disappeared responsive modules.

**References**

1. Tomasevic G, Kamme F, Wieloch T. Changes in proliferating cell nuclear antigen, a protein involved in DNA repair, in vulnerable hippocampal neurons following global cerebral ischemia. *Brain Res Mol Brain Res.* 1998;60:168-76.
2. Martin LJ. *J Neuropathol.* DNA damage and repair: relevance to mechanisms of neurodegeneration. *Exp Neurol.* 2008;67:377-87.
3. Springer J, Schust S, Peske K, Tschirner A, Rex A, Engel O, et al. Catabolic signaling and muscle wasting after acute ischemic stroke in mice: indication for a stroke-specific sarcopenia. *Stroke.* 2014;45:3675-83.

**Table S5. Relationship between pathways on RM<sup>E</sup>s and cerebral ischemia supported by previous literature.**

| <b>Groups</b>    | <b>GO biological processes</b>                                                                 | <b>Pathway</b>                                    | <b>References</b>   | <b>Whether related to CI</b> |
|------------------|------------------------------------------------------------------------------------------------|---------------------------------------------------|---------------------|------------------------------|
| <b>BA and BJ</b> | <b>Negative regulation of ubiquitin-protein ligase activity involved in mitotic cell cycle</b> | <b>Proteasome</b>                                 | <b>1,2,3</b>        | <b>Yes</b>                   |
| <b>JA and JU</b> | <b>Establishment of protein localization</b>                                                   | <b>Endocytosis</b>                                | <b>4,5</b>          | <b>Yes</b>                   |
| <b>BA</b>        | <b>Generation of precursor metabolites and energy</b>                                          | <b>Starch and sucrose metabolism</b>              | <b>not reported</b> | <b>\</b>                     |
| <b>JA</b>        | <b>Branched chain family amino acid catabolic process</b>                                      | <b>Valine, leucine and isoleucine degradation</b> | <b>6</b>            | <b>Yes</b>                   |
|                  | <b>Negative regulation of DNA replication</b>                                                  | <b>Cell cycle</b>                                 | <b>7</b>            | <b>Yes</b>                   |
| <b>UA</b>        | <b>Secretion by cell</b>                                                                       | <b>SNARE interactions in vesicular transport</b>  | <b>8</b>            | <b>Yes</b>                   |
| <b>JU</b>        | <b>Positive regulation of nitrogen compound metabolic process</b>                              | <b>NOD-like receptor signaling pathway</b>        | <b>9</b>            | <b>Yes</b>                   |
|                  |                                                                                                | <b>Antigen processing and presentation</b>        | <b>not reported</b> | <b>\</b>                     |

**Note:** We just enriched the pathways that correspond to the differential functions.

CI = cerebral ischemia; RM<sup>E</sup>s = emerged responsive modules.

#### **References**

1. Ge P, Luo Y, Liu CL, Hu B. Protein aggregation and proteasome dysfunction after brain ischemia. *Stroke*. 2007;38:3230-6.
2. Zhang W, Stanimirovic D. Current and future therapeutic strategies to target inflammation in stroke. *Curr Drug Targets Inflamm Allergy*. 2002;1:151-66.
3. Liu XQ, Sheng R, Qin ZH. The neuroprotective mechanism of brain ischemic preconditioning. *Acta Pharmacol Sin*. 2009;30:1071-80.
4. Vaslin A, Puyal J, Clarke PG. Excitotoxicity-induced endocytosis confers drug targeting in cerebral ischemia. *Ann Neurol*. 2009;65:337-47.
5. Vaslin A, Naegel-Tollardo S, Puyal J, Clarke PG. Excitotoxicity-induced endocytosis mediates neuroprotection by TAT-peptide-linked JNK inhibitor. *J Neurochem*. 2011;119:1243-52.
6. Kimberly WT, Wang Y, Pham L, Furie KL, Gerszten RE. Metabolite profiling identifies a branched chain amino acid signature in acute cardioembolic stroke. *Stroke*. 2013;44:1389-95.
7. Wen Y, Yang S, Liu R, Simpkins JW. Cell-cycle regulators are involved in transient cerebral ischemia induced neuronal apoptosis in female rats. *FEBS Lett*. 2005;
8. Honer WG, Barr AM, Sawada K, Thornton AE, Morris MC, Leurgans SE, Schneider JA, Bennett DA. Cognitive reserve, presynaptic proteins and dementia in the elderly. *Transl Psychiatry*. 2012;2:e114.
9. Liu H, Wei X, Kong L, Liu X, Cheng L, Yan S, Zhang X, Chen L. NOD2 is Involved in the

Inflammatory Response after Cerebral Ischemia-Reperfusion Injury and Triggers NADPH Oxidase 2-Derived Reactive Oxygen Species. *Int J Biol Sci.* 2015;11:525-35.



**Table S6. Relationship between pathways on RM<sup>D</sup>s and cerebral ischemia supported by previous literature.**

| <b>Groups</b>            | <b>GO biological processes</b>                                | <b>Pathway</b>                                    | <b>References</b> | <b>Whether related to CI</b> |
|--------------------------|---------------------------------------------------------------|---------------------------------------------------|-------------------|------------------------------|
| <b>BA, JA, JU and UA</b> | <b>Branched chain family amino acid catabolic process</b>     | <b>Valine, leucine and isoleucine degradation</b> | <b>1</b>          | <b>Yes</b>                   |
| <b>BA,UA and BJ</b>      | <b>Protein ADP-ribosylation</b>                               | <b>Base excision repair</b>                       | <b>2</b>          | <b>Yes</b>                   |
|                          | <b>Sensory perception of pain</b>                             | <b>Long-term potentiation</b>                     | <b>3</b>          | <b>Yes</b>                   |
| <b>BA and UA</b>         | <b>Complement activation, classical pathway</b>               | <b>Systemic lupus erythematosus</b>               | <b>4</b>          | <b>Yes</b>                   |
|                          |                                                               | <b>Complement and coagulation cascades</b>        | <b>5,6,7</b>      | <b>Yes</b>                   |
|                          |                                                               | <b>Prion diseases</b>                             | <b>8</b>          | <b>Yes</b>                   |
| <b>BJ and JU</b>         | <b>Catabolic process</b>                                      | <b>Nucleotide excision repair</b>                 | <b>9</b>          | <b>Yes</b>                   |
| <b>BA</b>                | <b>Positive regulation of cellular component organization</b> | <b>mTOR signaling pathway</b>                     | <b>10</b>         | <b>Yes</b>                   |
|                          |                                                               | <b>Insulin signaling pathway</b>                  | <b>11</b>         |                              |
|                          |                                                               | <b>Prostate cancer</b>                            | <b>12</b>         | <b>Yes</b>                   |
| <b>JA</b>                | <b>Secretion by cell</b>                                      | <b>Neurotrophin signaling pathway</b>             | <b>13</b>         | <b>Yes</b>                   |
| <b>UA</b>                | <b>Tricarboxylic acid cycle</b>                               | <b>Citrate cycle (TCA cycle)</b>                  | <b>14</b>         | <b>Yes</b>                   |

**Note:** We just enriched the pathways that correspond to the differential functions.

CI = cerebral ischemia; RM<sup>D</sup>s = disappeared responsive modules.

#### **References**

1. Kimberly WT, Wang Y, Pham L, Furie KL, Gerszten RE. Metabolite profiling identifies a branched chain amino acid signature in acute cardioembolic stroke. *Stroke*. 2013;44:1389-95.
2. Luo Y, Ji X, Ling F, Li W, Zhang F, Cao G, Chen J. Impaired DNA repair via the base-excision repair pathway after focal ischemic brain injury: a protein phosphorylation-dependent mechanism reversed by hypothermic neuroprotection. *Front Biosci*. 2007;12:1852-62.
3. He W, Xu X, Lv Q, Guo L. Low dose ZD7288 attenuates the ischemia/reperfusion-induced impairment of long-term potentiation induction at hippocampal Schaffer collateral-CA1 synapses. *Cell Mol Neurobiol*. 2014;34:611-7.
4. Perju-Dumbrava L, Zeiler K, Kapiotis S, Deecke L. Anticardiolipin-antibodies in stroke and in other neurological disorders. *Rom J Neurol Psychiatry*. 1995;33:137-43.
5. Yang J, Ahn HN, Chang M, Narasimhan P, Chan PH, Song YS. Complement component 3 inhibition

- by an antioxidant is neuroprotective after cerebral ischemia and reperfusion in mice. *J Neurochem.* 2013;124:523-35.
6. Duehrkop C, Rieben R. Ischemia/reperfusion injury: effect of simultaneous inhibition of plasma cascade systems versus specific complement inhibition. *Biochem Pharmacol.* 2014;88:12-22.
  7. Oikonomopoulou K, Ricklin D, Ward PA, Lambris JD. Interactions between coagulation and complement--their role in inflammation. *Semin Immunopathol.* 2012;34:151-65.
  8. Shyu WC, Lin SZ, Chiang MF, Ding DC, Li KW, Chen SF, et al. Overexpression of PrPC by adenovirus-mediated gene targeting reduces ischemic injury in a stroke rat model. *J Neurosci.* 2005;25:8967-77.
  9. Tomasevic G, Kamme F, Wieloch T. Changes in proliferating cell nuclear antigen, a protein involved in DNA repair, in vulnerable hippocampal neurons following global cerebral ischemia. *Brain Res Mol Brain Res.* 1998;60:168-76.
  10. Li CY, Li X, Liu SF, Qu WS, Wang W, Tian DS. Inhibition of mTOR pathway restrains astrocyte proliferation, migration and production of inflammatory mediators after oxygen-glucose deprivation and reoxygenation. *Neurochem Int.* 2015;83-84:9-18.
  11. Shu X, Zhang Y, Xu H, Kang K, Cai D. Brain-derived neurotrophic factor inhibits glucose intolerance after cerebral ischemia. *Neural Regen Res.* 2013;8:2370-8.
  12. Yang Y, Bai X, Dong H, Lu Y, Xiong L. Intracerebroventricular injection of human prostatic acid phosphatase has potent neuroprotective effects against transient focal cerebral ischemia in rats. *Neurosci Lett.* 2011;504:321-4.
  13. Choi Y, Kang SG, Kam KY. Changes in the BDNF-immunopositive cell population of neocortical layers I and II/III after focal cerebral ischemia in rats. *Brain Res.* 2015;1605:76-82.
  14. Nordström CH, Rehncrona S, Siesjö BK. Effects of phenobarbital in cerebral ischemia. Part II: restitution of cerebral energy state, as well as of glycolytic metabolites, citric acid cycle intermediates and associated amino acids after pronounced incomplete ischemia. *Stroke.* 1978;9:335-43.
